# Supplementary material for: Evolution of lithium ordering with (de)-lithiation in β-LiVOPO4: insights through solid-state NMR and first principles DFT calculations
Source: Royal Society of Chemistry journal article supplement (doi:10.1039/d0ta00121j), 2020-01-01
Supplement: d0ta00121j1.pdf [file d0ta00121j1.pdf]

# Evolution of lithium ordering with (de)-lithiation in $\beta$ - $\text{LiVOPO}_4$ : Insights through solid state NMR and first principles DFT calculations

## Supporting Information

**SI. 1.** Density of states plot for lowest energy  $\text{Li}_x\text{VOPO}_4$  ( $x=1, 1.5$  and  $2$ ) structures optimized with the PBE0 hybrid functional. Energy is plotted relative to the Fermi energy ( $E_F$ ) for each structure.

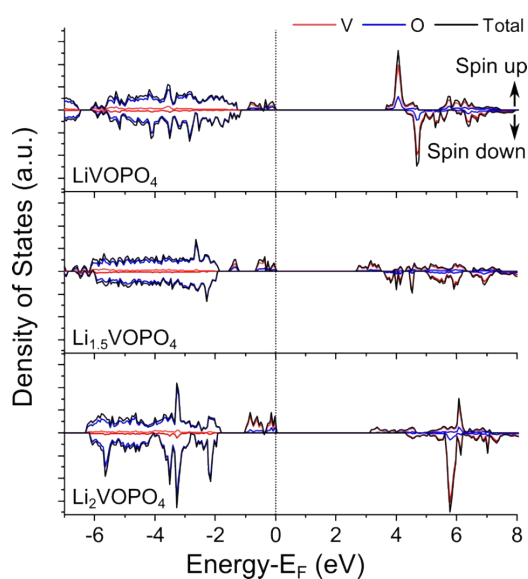

**SI. 2.** Galvanostatic Intermittent Titration Technique (GITT) curve of the first discharge of  $\beta$ - $\text{LiVOPO}_4$  at a rate of  $C/100$  with 100 hours of rest between each  $\sim 0.03$  Li increment.

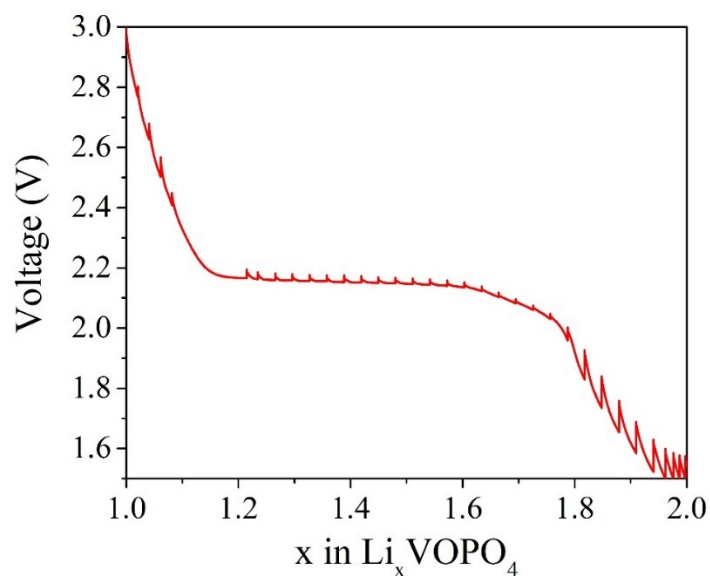

**SI. 3.**  $^7\text{Li}$  NMR spectra of  $\beta\text{-LiVOPO}_4$  cycled to different states of charge (SOC) in the lower voltage region between 2.4 V and 1.5 V. The spectra are scaled by mass and number of scans. The points in the galvanostatic discharge curve at which the NMR spectra were acquired are as marked in Figure 3. The spectra were acquired at a MAS frequency of 60 kHz at 4.7 T.

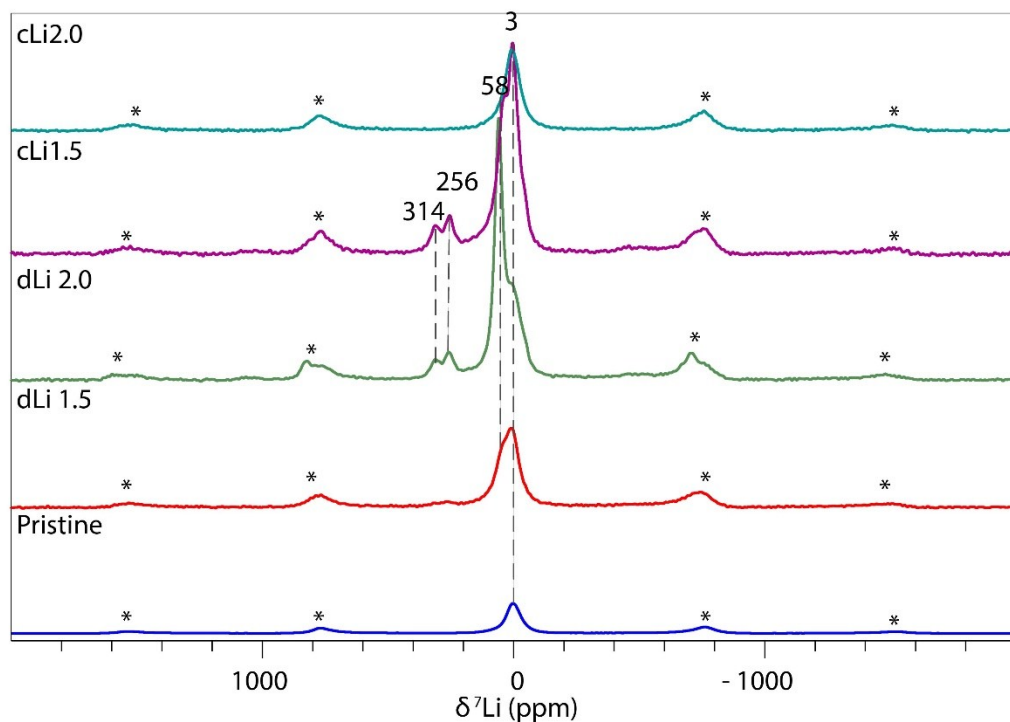

**SI. 4.** Electrochemical charge-discharge curve of  $\beta\text{-VOPO}_4$  derived from tetragonal  $\text{H}_2\text{VOPO}_4$ .

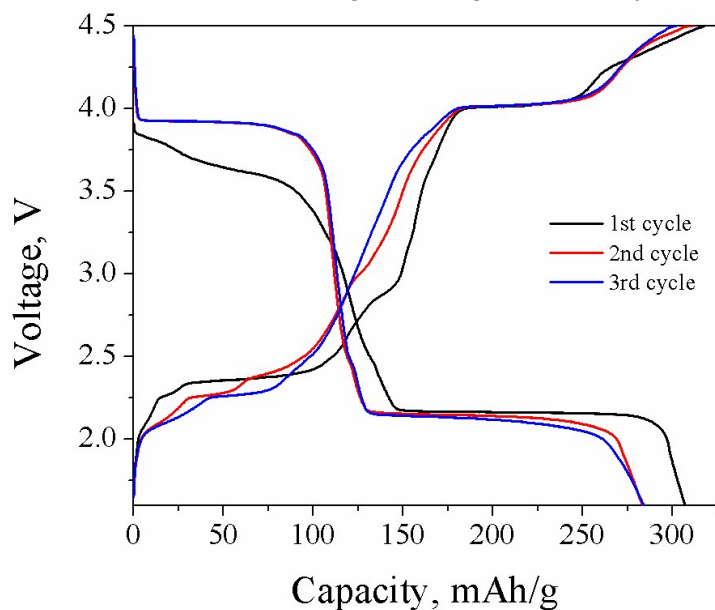

**SI. 5.**  $^{31}\text{P}$  NMR spectrum of (a) chemically-lithiated  $\beta\text{-Li}_2\text{VOPO}_4$ , compared with (b) electrochemically-lithiated  $\beta\text{-Li}_2\text{VOPO}_4$  discharged to 1.6 V, and (c) electrochemically-lithiated  $\beta\text{-Li}_2\text{VOPO}_4$  (sample corresponding to that shown in (b)) after 3 months. The minor peaks at  $\sim 4300$  ppm and  $3200$  ppm in the spectrum of chemically-lithiated  $\beta\text{-Li}_2\text{VOPO}_4$  (labelled as  $\epsilon$ ) are assigned to an  $\epsilon\text{-Li}_2\text{VOPO}_4$  impurity.

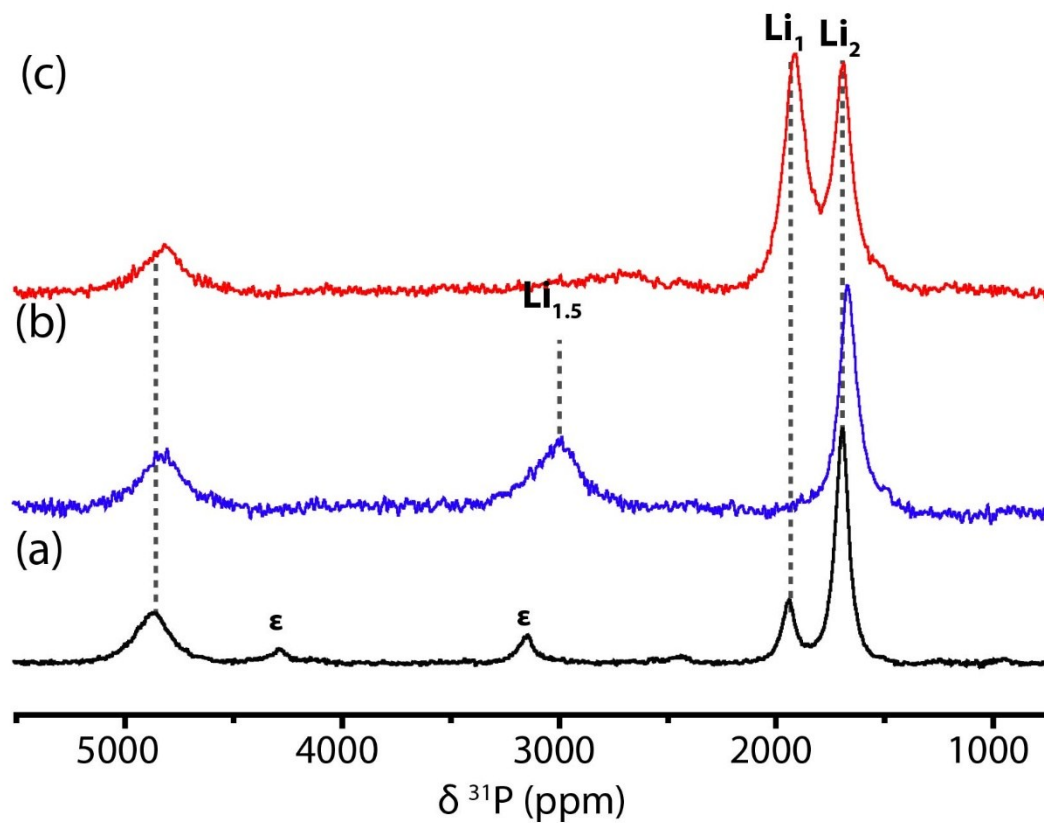

**SI. 6.** Calculated X-ray diffraction patterns (Cu K $\alpha$  radiation) of (a)  $\beta$ -Li<sub>1.5</sub>VOPO<sub>4</sub>, (b) the lowest energy structure of  $\beta$ -Li<sub>2</sub>VOPO<sub>4</sub>(str 1) and (c) a slightly higher energy ordering of  $\beta$ -Li<sub>2</sub>VOPO<sub>4</sub> (str 2). These structures are obtained after optimisation with PBE0 functional.

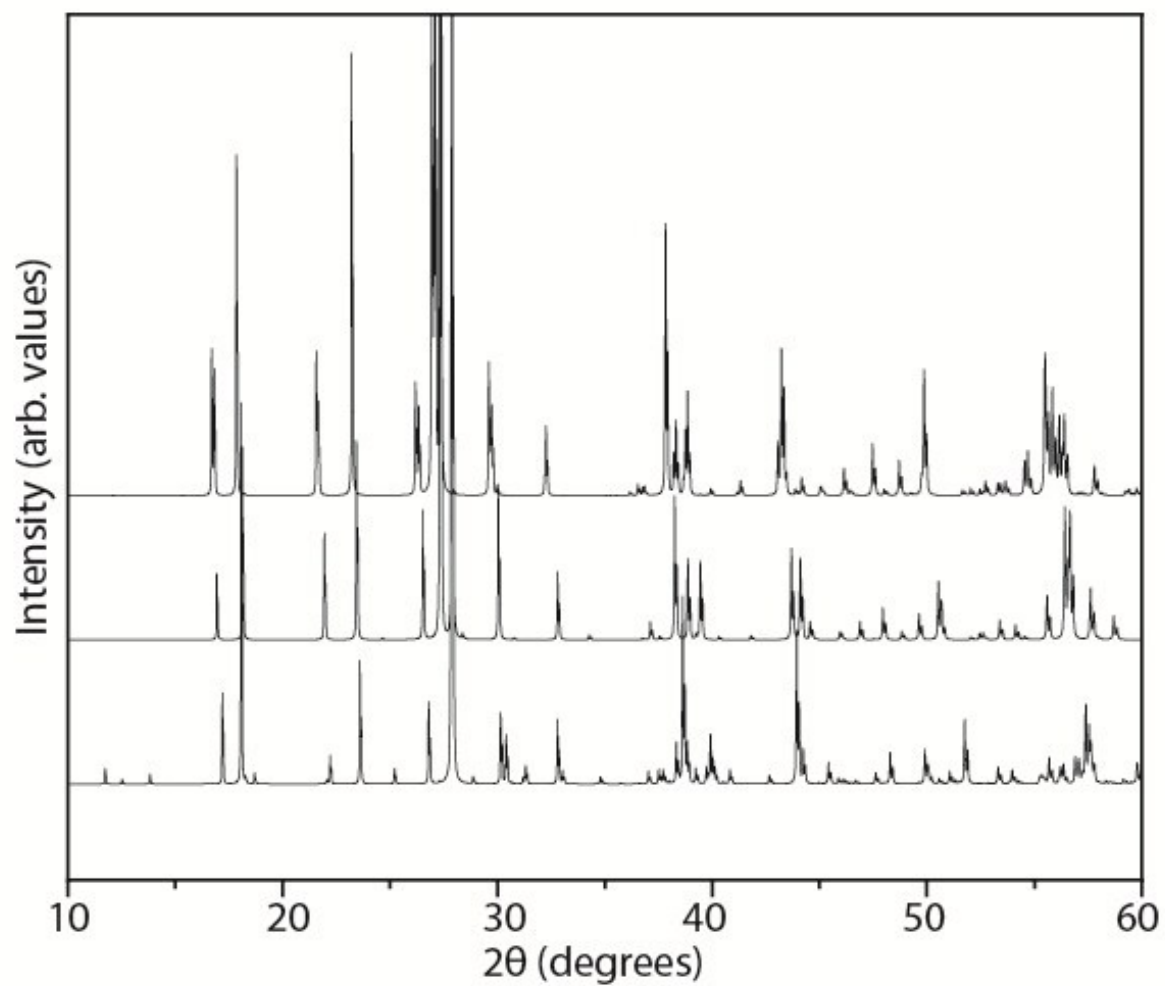

**Table SI. 1.** Structure of  $\text{LiVOPO}_4$  optimised with PBE0 functional.  $a=7.351 \text{ \AA}$ ,  $b=6.279 \text{ \AA}$ ,  $c=7.147 \text{ \AA}$ ,  $\alpha=90.00^\circ$ ,  $\beta=90.00^\circ$  and  $\gamma=90.00^\circ$ .

| Atom | Fractional Coordinate |        |        |
|------|-----------------------|--------|--------|
|      | x                     | y      | z      |
| Li   | -0.500                | 0.000  | 0.000  |
| Li   | 0.000                 | 0.000  | -0.500 |
| Li   | -0.500                | -0.500 | 0.000  |
| Li   | 0.000                 | -0.500 | 0.500  |
| V    | 0.328                 | 0.250  | -0.278 |
| V    | -0.328                | -0.250 | 0.278  |
| V    | 0.172                 | -0.250 | 0.222  |
| V    | -0.172                | 0.250  | -0.222 |
| P    | -0.374                | 0.250  | 0.372  |
| P    | 0.374                 | -0.250 | -0.372 |
| P    | -0.126                | -0.250 | -0.128 |
| P    | 0.126                 | 0.250  | 0.128  |
| O    | 0.453                 | 0.250  | 0.489  |
| O    | -0.453                | -0.250 | -0.489 |
| O    | 0.047                 | -0.250 | -0.011 |
| O    | -0.047                | 0.250  | 0.011  |
| O    | 0.371                 | -0.055 | -0.241 |
| O    | -0.371                | 0.055  | 0.241  |
| O    | 0.129                 | 0.055  | 0.259  |
| O    | -0.129                | -0.055 | -0.259 |
| O    | -0.371                | 0.445  | 0.241  |
| O    | 0.371                 | -0.445 | -0.241 |
| O    | -0.129                | -0.445 | -0.259 |
| O    | 0.129                 | 0.445  | 0.259  |
| O    | 0.300                 | 0.250  | 0.004  |
| O    | -0.300                | -0.250 | -0.004 |
| O    | 0.200                 | -0.250 | -0.496 |
| O    | -0.200                | 0.250  | 0.496  |

|   |        |        |        |
|---|--------|--------|--------|
| O | 0.116  | 0.250  | -0.344 |
| O | -0.116 | -0.250 | 0.344  |
| O | 0.384  | -0.250 | 0.156  |
| O | -0.384 | 0.250  | -0.156 |

---

**Table SI. 2.** Structure of  $\text{Li}_{1.5}\text{VOPO}_4$  before optimisation.  $a=6.643 \text{ \AA}$ ,  $b=7.864 \text{ \AA}$ ,  $c=7.521 \text{ \AA}$ ,  $\alpha=90.53^\circ$ ,  $\beta=90.00^\circ$  and  $\gamma=90.00^\circ$ .

| Atom | Fractional Coordinate |        |        |
|------|-----------------------|--------|--------|
|      | x                     | y      | z      |
| Li   | -0.192                | 0.304  | -0.064 |
| Li   | 0.192                 | -0.316 | 0.064  |
| Li   | -0.251                | -0.200 | -0.433 |
| Li   | 0.050                 | 0.045  | 0.482  |
| Li   | 0.493                 | 0.494  | 0.000  |
| Li   | 0.458                 | 0.042  | 0.491  |
| V    | -0.254                | -0.374 | 0.257  |
| V    | 0.254                 | 0.368  | -0.265 |
| V    | 0.253                 | -0.136 | -0.236 |
| V    | -0.254                | 0.124  | 0.237  |
| P    | -0.252                | -0.134 | -0.118 |
| P    | 0.251                 | -0.371 | 0.384  |
| P    | -0.250                | 0.371  | -0.383 |
| P    | 0.250                 | 0.122  | 0.124  |
| O    | -0.259                | -0.452 | -0.490 |
| O    | -0.242                | 0.045  | -0.008 |
| O    | 0.239                 | -0.059 | 0.016  |
| O    | 0.260                 | 0.457  | 0.499  |
| O    | 0.061                 | 0.133  | 0.244  |
| O    | -0.426                | 0.364  | -0.248 |

|   |        |        |        |
|---|--------|--------|--------|
| O | -0.055 | 0.368  | -0.267 |
| O | 0.436  | 0.115  | 0.250  |
| O | -0.435 | -0.123 | -0.249 |
| O | 0.056  | -0.373 | 0.269  |
| O | -0.063 | -0.142 | -0.240 |
| O | 0.428  | -0.372 | 0.249  |
| O | -0.265 | 0.365  | 0.170  |
| O | -0.248 | -0.110 | 0.336  |
| O | 0.267  | -0.399 | -0.162 |
| O | 0.250  | 0.124  | -0.328 |
| O | 0.259  | -0.190 | 0.495  |
| O | -0.257 | 0.195  | -0.499 |
| O | -0.270 | -0.307 | -0.005 |
| O | 0.267  | 0.292  | 0.005  |

---

**Table SI.3.** Structure of  $\text{Li}_{1.5}\text{VOPO}_4$  after structural optimisation with PBE0 functional.  $a=6.402 \text{ \AA}$ ,  $b=7.059 \text{ \AA}$ ,  $c=7.534 \text{ \AA}$ ,  $\alpha=89.99^\circ$ ,  $\beta=89.36^\circ$  and  $\gamma=89.99^\circ$ .

| Atom | Fractional Coordinate |        |        |
|------|-----------------------|--------|--------|
|      | x                     | y      | z      |
| Li   | -0.109                | 0.313  | -0.047 |
| Li   | 0.134                 | -0.324 | 0.046  |
| Li   | -0.365                | -0.189 | -0.454 |
| Li   | -0.007                | 0.088  | -0.439 |
| Li   | 0.494                 | 0.399  | 0.059  |
| Li   | 0.388                 | 0.180  | 0.452  |
| V    | -0.233                | -0.380 | 0.255  |
| V    | 0.254                 | 0.370  | -0.260 |
| V    | 0.267                 | -0.134 | -0.245 |
| V    | -0.247                | 0.116  | 0.240  |

|   |        |        |        |
|---|--------|--------|--------|
| P | -0.215 | -0.132 | -0.122 |
| P | 0.285  | -0.382 | 0.378  |
| P | -0.272 | 0.373  | -0.378 |
| P | 0.228  | 0.113  | 0.122  |
| O | -0.275 | -0.443 | -0.484 |
| O | -0.208 | 0.054  | -0.012 |
| O | 0.225  | -0.071 | 0.016  |
| O | 0.293  | 0.432  | 0.487  |
| O | 0.065  | 0.114  | 0.276  |
| O | -0.435 | 0.372  | -0.224 |
| O | -0.059 | 0.339  | -0.289 |
| O | 0.441  | 0.147  | 0.211  |
| O | -0.426 | -0.146 | -0.216 |
| O | 0.074  | -0.369 | 0.283  |
| O | -0.050 | -0.118 | -0.275 |
| O | 0.450  | -0.396 | 0.225  |
| O | -0.234 | 0.363  | 0.172  |
| O | -0.264 | -0.113 | 0.320  |
| O | 0.235  | -0.401 | -0.180 |
| O | 0.266  | 0.123  | -0.329 |
| O | 0.329  | -0.209 | 0.495  |
| O | -0.305 | 0.198  | -0.499 |
| O | -0.170 | -0.305 | -0.006 |
| O | 0.196  | 0.289  | 0.001  |

---

**Table SI. 4.** Lowest energy structure of  $\text{Li}_2\text{VOPO}_4$  (structure 1) after structural optimisation with PBE0 functional.  $a=6.394 \text{ \AA}$ ,  $b=7.583 \text{ \AA}$ ,  $c=7.220 \text{ \AA}$ ,  $\alpha=90.00^\circ$ ,  $\beta=89.99^\circ$  and  $\gamma=90.00^\circ$ .

---

| Atom | Fractional Coordinate |
|------|-----------------------|
|------|-----------------------|

---



|    | x      | y      | z      |
|----|--------|--------|--------|
| Li | 0.000  | 0.500  | 0.000  |
| Li | 0.500  | 0.000  | -0.500 |
| Li | -0.500 | -0.500 | 0.000  |
| Li | 0.000  | 0.000  | -0.500 |
| Li | -0.250 | -0.432 | -0.225 |
| Li | -0.250 | -0.068 | 0.275  |
| Li | 0.250  | 0.432  | 0.225  |
| Li | 0.250  | 0.068  | -0.275 |
| V  | 0.250  | -0.246 | -0.129 |
| V  | 0.250  | -0.254 | 0.371  |
| V  | -0.250 | 0.246  | 0.129  |
| V  | -0.250 | 0.254  | -0.371 |
| P  | 0.250  | 0.126  | 0.131  |
| P  | 0.250  | 0.374  | -0.369 |
| P  | -0.250 | -0.126 | -0.131 |
| P  | -0.250 | -0.374 | 0.369  |
| O  | 0.250  | 0.010  | -0.039 |
| O  | 0.250  | 0.490  | 0.460  |
| O  | -0.250 | -0.010 | 0.039  |
| O  | -0.250 | -0.490 | -0.460 |
| O  | -0.064 | -0.259 | -0.132 |
| O  | -0.436 | -0.241 | 0.368  |
| O  | 0.436  | 0.259  | 0.132  |
| O  | 0.064  | 0.241  | -0.368 |
| O  | 0.064  | 0.259  | 0.132  |
| O  | 0.436  | 0.241  | -0.368 |
| O  | -0.436 | -0.259 | -0.132 |
| O  | -0.064 | -0.241 | 0.368  |
| O  | 0.250  | 0.485  | -0.192 |
| O  | 0.250  | 0.015  | 0.308  |

|   |        |        |        |
|---|--------|--------|--------|
| O | -0.250 | -0.485 | 0.192  |
| O | -0.250 | -0.015 | -0.308 |
| O | 0.250  | -0.148 | -0.381 |
| O | 0.250  | -0.352 | 0.119  |
| O | -0.250 | 0.148  | 0.381  |
| O | -0.250 | 0.352  | -0.119 |

**Table SI. 5.** Metastable structure of  $\text{Li}_2\text{VOPO}_4$  (structure 2) after structural optimisation with PBE0 functional.  $a=6.521 \text{ \AA}$ ,  $b=7.656 \text{ \AA}$ ,  $c=7.310 \text{ \AA}$ ,  $\alpha=90.39^\circ$ ,  $\beta=90.00^\circ$  and  $\gamma=90.00^\circ$ .

| Atom | Fractional Coordinate |        |        |
|------|-----------------------|--------|--------|
|      | x                     | y      | z      |
| Li   | -0.269                | -0.442 | -0.064 |
| Li   | -0.478                | -0.163 | -0.384 |
| Li   | 0.231                 | 0.442  | 0.064  |
| Li   | 0.022                 | 0.163  | 0.384  |
| Li   | -0.271                | -0.053 | 0.309  |
| Li   | 0.229                 | 0.053  | -0.309 |
| Li   | 0.494                 | 0.316  | 0.372  |
| Li   | -0.006                | -0.316 | -0.372 |
| V    | 0.251                 | -0.247 | -0.113 |
| V    | 0.248                 | -0.257 | 0.363  |
| V    | -0.249                | 0.247  | 0.114  |
| V    | -0.252                | 0.257  | -0.363 |
| P    | 0.252                 | 0.118  | 0.122  |
| P    | 0.246                 | 0.378  | -0.369 |
| P    | -0.248                | -0.118 | -0.122 |
| P    | -0.254                | -0.378 | 0.370  |
| O    | 0.253                 | 0.013  | -0.055 |
| O    | 0.254                 | 0.485  | 0.453  |
| O    | -0.247                | -0.013 | 0.055  |
| O    | -0.246                | -0.485 | -0.453 |

- O -0.068 -0.251 -0.128
  - O -0.437 -0.246 0.380
  - O 0.432 0.251 0.128
  - O 0.063 0.246 -0.380
  - O 0.064 0.244 0.136
  - O 0.431 0.251 -0.373
  - O -0.436 -0.245 -0.136
  - O -0.069 -0.252 0.373
  - O 0.228 0.492 -0.198
  - O 0.246 0.009 0.298
  - O -0.272 -0.492 0.198
  - O -0.254 -0.009 -0.298
  - O 0.242 -0.179 -0.376
  - O 0.252 -0.328 0.122
  - O -0.257 0.179 0.376
  - O -0.248 0.328 -0.122
- 
-

**Table SI. 6.** Key Li-Li distances in Structure 2 of  $\beta$ -Li<sub>2</sub>VOPO<sub>4</sub>. (The structure is depicted in Fig. 2(e) of the main text).

| Labels |     | Li-Li Distances (Å) |
|--------|-----|---------------------|
| Li2    | Li6 | 2.8                 |
| Li1    | Li5 | 3.0                 |
| Li1    | Li2 | 3.3                 |
| Li5    | Li6 | 3.5                 |
